# Supplementary material
Source: PubMed Central journal article supplement (PMC6507425)

In the format provided by the authors and unedited.

# Genome-wide analysis identifies NR4A1 as a key mediator of T cell dysfunction

Xindong Liu<sup>1,9\*</sup>, Yun Wang<sup>1,9</sup>, Huiping Lu<sup>2,9</sup>, Jing Li<sup>2</sup>, Xiaowei Yan<sup>3</sup>, Minglu Xiao<sup>4</sup>, Jing Hao<sup>2</sup>, Andrei Alekseev<sup>5</sup>, Hiep Khong<sup>5</sup>, Tenghui Chen<sup>5</sup>, Rui Huang<sup>1</sup>, Jin Wu<sup>1</sup>, Qiwen Zhao<sup>1</sup>, Qi Wu<sup>2</sup>, Senlin Xu<sup>1</sup>, Xiaohu Wang<sup>2</sup>, Wei Jin<sup>2</sup>, Shicang Yu<sup>1</sup>, Yan Wang<sup>1</sup>, Lai Wei<sup>6</sup>, Aibo Wang<sup>5</sup>, Bo Zhong<sup>7</sup>, Ling Ni<sup>2</sup>, Xiaolong Liu<sup>8</sup>, Roza Nurieva<sup>5</sup>, Lilin Ye<sup>4</sup>, Qiang Tian<sup>3</sup>, Xiu-Wu Bian<sup>1\*</sup> & Chen Dong<sup>2\*</sup>

---

<sup>1</sup>Institute of Pathology and Southwest Cancer Center, Southwest Hospital, Third Military Medical University (Army Medical University), Chongqing, China. <sup>2</sup>Tsinghua University, Beijing, China. <sup>3</sup>Institute for Systems Biology, Seattle, WA, USA. <sup>4</sup>Institute of Immunology, Third Military Medical University (Army Medical University), Chongqing, China. <sup>5</sup>MD Anderson Cancer Center, Houston, TX, USA. <sup>6</sup>Zhongshan Ophthalmic Center, Sun Yat-sen University, Guangzhou, China. <sup>7</sup>Medical Research Institute, School of Medicine, Wuhan University, Wuhan, China. <sup>8</sup>Shanghai Institute of Biological Sciences, Chinese Academy of Sciences, Shanghai, China. <sup>9</sup>These authors contributed equally: Xindong Liu, Yun Wang, Huiping Lu.  
\*e-mail: xindongliu@hotmail.com; bianxiuwu@263.net; chendong@tsinghua.edu.cn

## **Supplementary Table Legends**

### **Supplementary Table 1. Ttol-cell-related genes list (2357 genes)**

This file listed differential genes in tolerant T cells, in comparison with activated Th1, Th2, Th17 cell subsets. Genes expression significantly enriched over 2 folds are shown. This table is related with Fig. 1c.

### **Supplementary Table 2. 174 commonly shared genes from Ttol, Texh and T-NF-AT**

After comparison of Ttol-relevant genes with NF-AT-induced genes in T<sub>NF-AT</sub> cell and Texh-relevant genes. 174 genes were found commonly shared and listed. This table is related with Extended data Fig. 1d.

### **Supplementary Table 3. Combinational analysis of gene profiling and histone modifications reveals unique transcriptional modules in Ttol cells**

This file contains a list of Ttol-cell-related 340 genes, whose transcriptional activities were consistent with their histone modification status. This table lists 112 upregulated genes, and 228 downregulated genes, and is related with Fig. 1h.

### **Supplementary Table 4. Overlay of Nr4a1-regulated genes with Ttol-relevant genes**

After comparison analysis of Nr4a1-regulated genes with Ttol-relevant genes, a total of 290 genes were found commonly shared, including 112 of induced genes, and 178 of repressed genes. This table is related with Fig. 4b.

### **Supplementary Table 5. list of ChIP-Seq samples**

This file contains details on ChIP-seq samples, clean reads, mapping reads, mapping ratio, and unique reads/ratio for each sample. The samples include anti-HA-Nr4a1, input control, Isotype IgG control, anti-c-Jun on RV-Nr4a1-, RV-vector-transduced T cells, plate-bound anti-CD3/anti-CD28-activated WT, and Nr4a1 KO T cells, as well as anti-H3K27ac on RV-Nr4a1-, RV-vector-transduced T cells, Naïve WT and Nr4a1 KO T cells, plate-bound anti-CD3/anti-CD28-activated WT, and Nr4a1 KO T cells.

### **Supplementary Table 6. list of gene downregulated by Nr4a1 (841) genes**

This file lists downregulated genes, whose gene loci were bound by Nr4a1 and/or with co-localized reduction of c-Jun peaks concomitantly. This table is related with Fig. 4h.

### **Supplementary Table 7. list of gene upregulated by Nr4a1 (860) genes**

This file lists upregulated genes, whose gene loci were bound by Nr4a1 and/or with co-localized enhancement of H3k27ac peaks concomitantly. This table is related with Fig. 4h.

Supplementary Figure 1 for Extended Data 9a - Uncropped scans with size marker indications

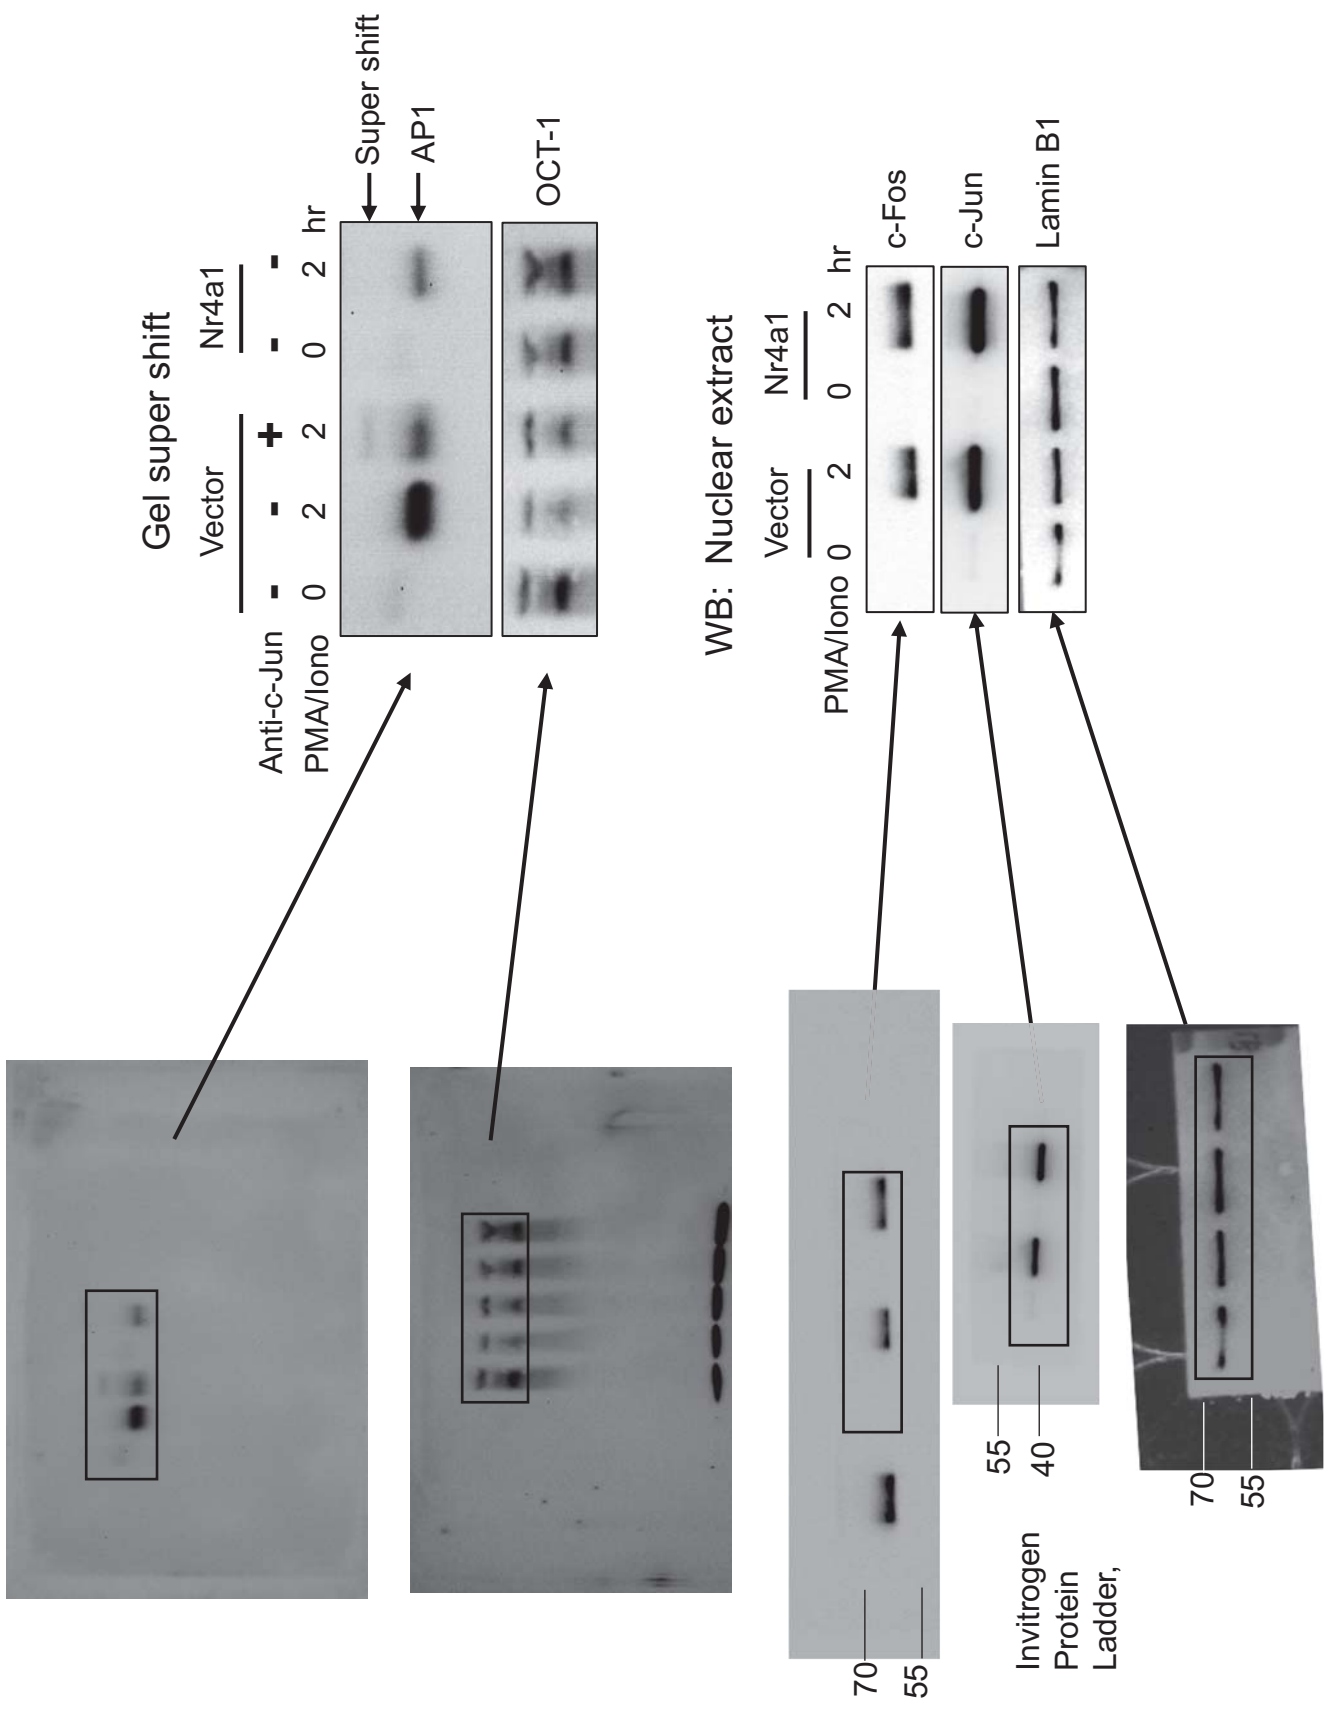

Supplement: NIHMS1019184-supplement-Suplemental.pdf [file NIHMS1019184-supplement-Suplemental.pdf]
